# Supplementary material for: DFT Studies on the Antioxidant Activity of Naringenin and Its Derivatives: Effects of the Substituents at C3
Source: PubMed Central journal article supplement (PMC6470621; doi:10.3390/ijms20061450), 2019-03-22
Supplement: ijms-20-01450-s001.pdf [file ijms-20-01450-s001.pdf]

# Supplementary materials for:

**DFT studies on the antioxidant activity of naringenin and its derivatives:**

**effects of the substituents at C3**

**Yan-Zhen Zheng <sup>1</sup>, Geng Deng <sup>2</sup>, Rui Guo <sup>1</sup>, Da-Fu Chen <sup>1,\*</sup> and Zhong-Min Fu <sup>1</sup>**

<sup>1</sup> College of Bee Science, Fujian Agriculture and Forestry University, Fuzhou 350002, P. R. China; yanzhenzheng@fafu.edu.cn (Y.Z.Z.); rui\_0508@163.com (R.G.); dfchen826@fafu.edu.cn (D.-F.C.); 369699776@qq.com (Z.-M.F)

<sup>2</sup> Key Laboratory of Bioorganic Phosphorous Chemistry and Chemical Biology (Ministry of Education), Department of Chemistry, Tsinghua University, Beijing 100084, P. R. China; dengg@mail.tsinghua.edu.cn (G.D.)

\* Correspondence: dfchen826@fafu.edu.cn (D.F.C.); Tel.: +86-0591-8378-9482\_\_\_\_\_

**Table S1.**  $\Delta$ BDE in kJ/mol obtained by the difference between BDE of the substituted naringenin and naringenin itself.

|                 | Gas   |      |      | Benzene |      |      | Water |      |      |
|-----------------|-------|------|------|---------|------|------|-------|------|------|
|                 | 4'-OH | 5-OH | 7-OH | 4'-OH   | 5-OH | 7-OH | 4'-OH | 5-OH | 7-OH |
| NH <sub>2</sub> | -2.3  | -2.7 | -1.4 | -1.9    | -2.2 | -1.6 | -1.5  | -1.3 | -2.4 |
| OH              | -1.1  | -1.9 | -1.0 | -0.7    | -1.7 | -1.4 | -0.7  | -1.1 | -1.8 |
| OMe             | -1.3  | -2.2 | -0.7 | -0.9    | -1.9 | -1.0 | 0.2   | -1.0 | -1.3 |
| Me              | 0.5   | -0.8 | -0.2 | 0.6     | -0.5 | -0.7 | -0.1  | -0.6 | -0.9 |
| F               | 2.1   | 1.1  | 0.4  | 2.2     | 0.6  | 0.9  | 2.4   | 0.4  | 1.4  |
| Cl              | 2.8   | 2.1  | 2.8  | 3.4     | 0.7  | 1.4  | 4.5   | 0.9  | 2.1  |
| CHO             | 3.4   | 2.9  | 3.2  | 3.7     | 0.9  | 3.2  | 4.8   | 1.5  | 2.6  |
| CF <sub>3</sub> | 4.5   | 3.2  | 3.7  | 4.0     | 1.5  | 4.1  | 4.9   | 2.4  | 3.5  |
| CN              | 5.6   | 3.9  | 5.1  | 5.7     | 2.3  | 5.7  | 5.1   | 2.7  | 5.1  |
| NO <sub>2</sub> | 7.2   | 4.4  | 6.2  | 6.9     | 2.9  | 7.1  | 6.2   | 3.1  | 7.1  |

**Table S2.** The Hammett sigma constants ( $\sigma_m$  and  $\sigma_p$ )<sup>a</sup>, the field/inductive parameter ( $F$ )<sup>a</sup> and resonance parameter ( $R$ )<sup>a</sup> of the substituents.

|                 | $\sigma_m$ | $\sigma_p$ | $F$  | $R$   |
|-----------------|------------|------------|------|-------|
| H               | 0.00       | 0.00       | 0.00 | 0.00  |
| NH <sub>2</sub> | -0.16      | -0.66      | 0.08 | -0.74 |
| OH              | 0.12       | -0.37      | 0.33 | -0.70 |
| OMe             | 0.12       | -0.27      | 0.29 | -0.56 |
| Me              | -0.07      | -0.17      | 0.01 | -0.18 |
| F               | 0.34       | 0.06       | 0.45 | -0.39 |
| Cl              | 0.37       | 0.23       | 0.42 | -0.19 |
| CHO             | 0.35       | 0.42       | 0.33 | 0.09  |
| CF <sub>3</sub> | 0.43       | 0.54       | 0.38 | 0.16  |
| CN              | 0.56       | 0.66       | 0.51 | 0.15  |
| NO <sub>2</sub> | 0.71       | 0.78       | 0.65 | 0.13  |

<sup>a</sup> Data from work by Hansch, Leo, and Taft (1991).

**Table S3.**  $\Delta$ IP in kJ/mol obtained by the difference between IP of the substituted naringenin and naringenin itself.

|                 | Gas  | Benzene | Water |
|-----------------|------|---------|-------|
| NH <sub>2</sub> | -4.1 | -3.6    | -6    |
| OH              | 6.8  | 1.4     | 1     |
| OMe             | 4.7  | 2.6     | -1.9  |
| Me              | -3.3 | -1.4    | -1    |
| F               | 22.7 | 18.9    | 8.9   |
| Cl              | 18.3 | 17.4    | 9.8   |
| CHO             | 19.4 | 18      | 12.6  |
| CF <sub>3</sub> | 22.8 | 19.8    | 11.1  |
| CN              | 35.5 | 28.9    | 12.8  |
| NO <sub>2</sub> | 41.4 | 35.4    | 18.8  |

**Table S4.**  $\Delta$ PA in kJ/mol obtained by the difference between PA of the substituted naringenin and naringenin itself.

|                 | Gas   |       |       | Benzene |       |       | Water |       |       |
|-----------------|-------|-------|-------|---------|-------|-------|-------|-------|-------|
|                 | 4'-OH | 5-OH  | 7-OH  | 4'-OH   | 5-OH  | 7-OH  | 4'-OH | 5-OH  | 7-OH  |
| NH <sub>2</sub> | 3.2   | 2.4   | 5.5   | 3.0     | 3.2   | 2.4   | 1.9   | 1.7   | 2.6   |
| OH              | -0.6  | -2.7  | -10.2 | -1.3    | -4.7  | -3.4  | -0.3  | -6.4  | -0.5  |
| OMe             | -0.8  | -9.9  | -7.5  | -1.4    | -6.5  | -4.4  | -0.4  | -2.7  | -0.8  |
| Me              | 0.6   | 2.0   | 2.9   | 1.2     | 2.4   | 0.8   | 0.3   | 1.4   | 0.4   |
| F               | -2.3  | -21.7 | -18.3 | -1.4    | -18.7 | -14.3 | -0.8  | -10.2 | -5.7  |
| Cl              | -1.7  | -21.3 | -18.4 | -1.8    | -17.6 | -14.2 | -1.1  | -8.1  | -5.6  |
| CHO             | -3.4  | -26.4 | -22.3 | -2.8    | -18.8 | -14.6 | -0.8  | -7.5  | -4.1  |
| CF <sub>3</sub> | -5.2  | -26.3 | -21.0 | -3.0    | -20.3 | -15.1 | -2.1  | -8.4  | -5.0  |
| CN              | -6.7  | -38.3 | -32.7 | -5.6    | -29.4 | -23.1 | -3.0  | -11.3 | -7.1  |
| NO <sub>2</sub> | -8.5  | -45.7 | -38.4 | -7.4    | -35.8 | -27.8 | -3.7  | -18.0 | -10.7 |
